# Supplementary material for: A regional modelling study of halogen chemistry within a volcanic plume of Mt Etna’s Christmas 2018 eruption
Source: Copernicus journal article supplement (doi:10.5194/egusphere-2023-184), 2023-02-22
Supplement: Supplementary file 1 [file egusphere-2023-184-supplement.pdf]

*Supplement of*

**A regional modelling study of halogen chemistry within a volcanic plume of Mt Etna's Christmas 2018 eruption**

Herizo Narivelo et al.

**Correspondence:** Paul Hamer (paul.hamer@nilu.no)

# 1 Figures

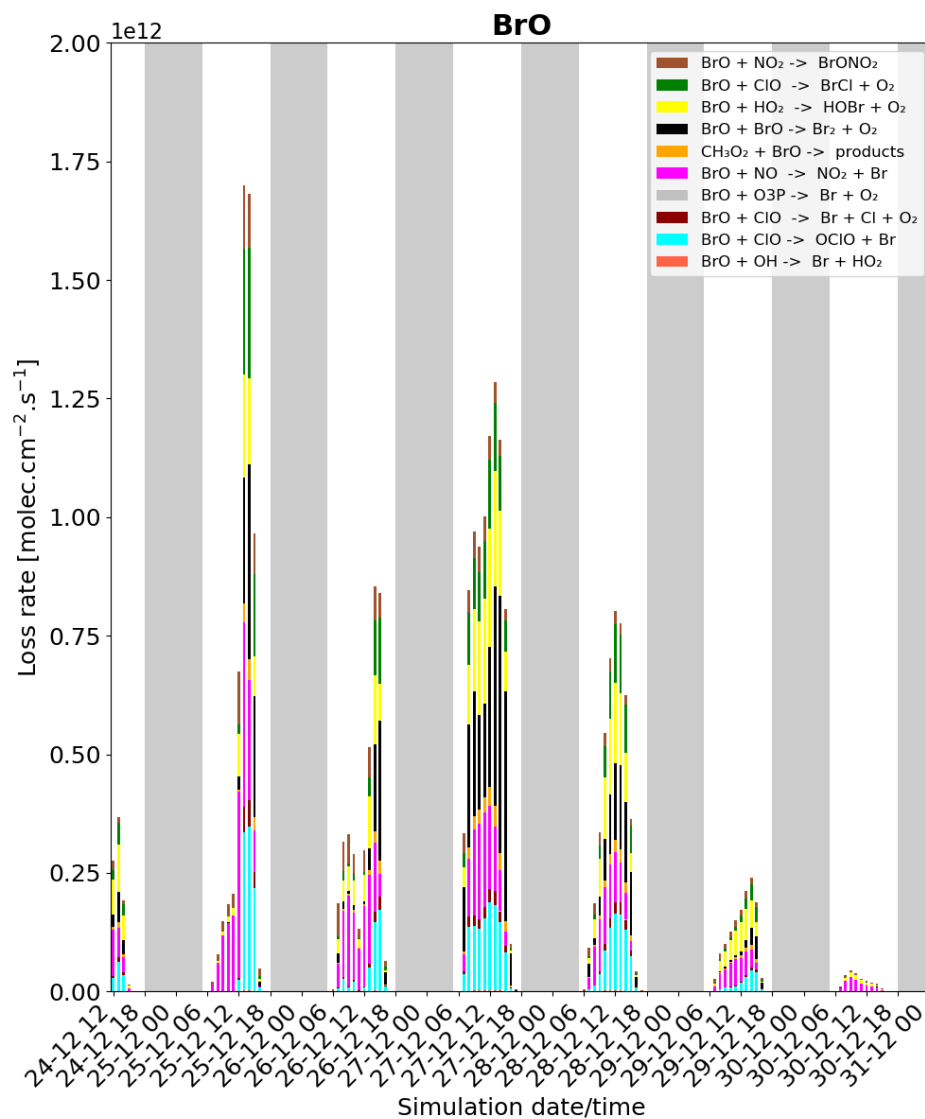

**Figure S1.** Time evolution of BrO loss rates in [molec.cm<sup>-2</sup>.s<sup>-1</sup>] without the photolysis of BrO and the BrO + BrO → Br + Br + O<sub>2</sub> reaction, from 24 December at 12:00 to 31 December 2018 at 00:00 UTC in the near volcano plume.

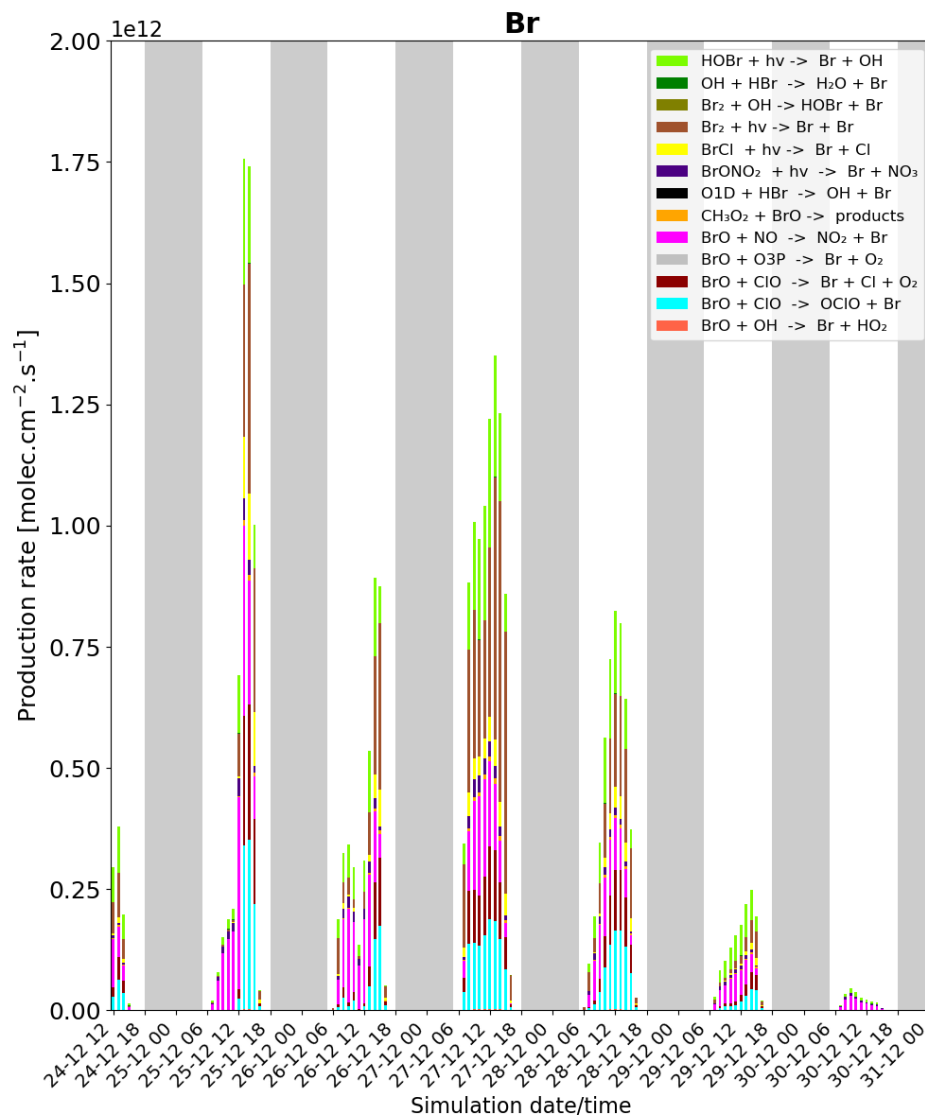

**Figure S2.** Time evolution of Br production rates in [ $\text{molec.cm}^{-2}.\text{s}^{-1}$ ] without the photolysis of BrO and the  $\text{BrO} + \text{BrO} \rightarrow \text{Br} + \text{Br} + \text{O}_2$  reaction, from 24 December at 12:00 to 31 December 2018 at 00:00 UTC in the near volcano plume.

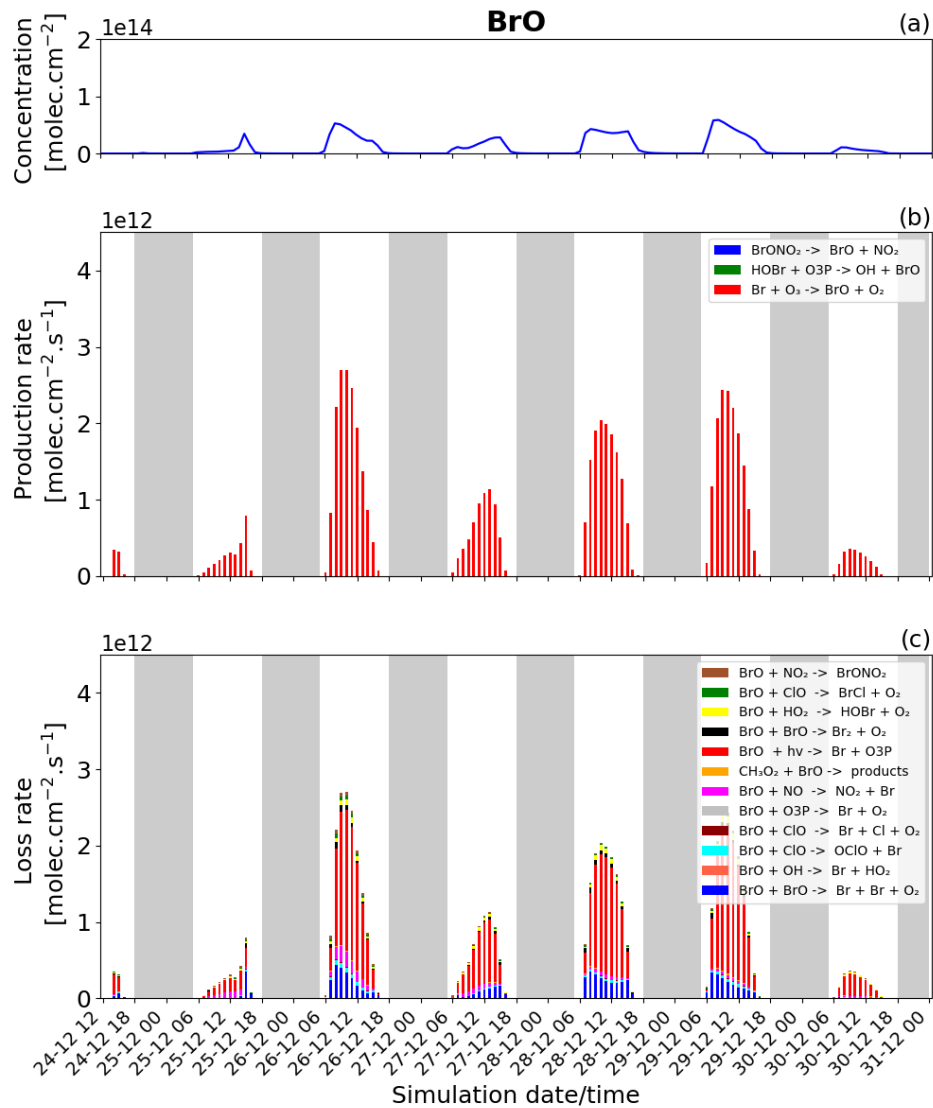

**Figure S3.** Time evolution of : (a) BrO column concentration in  $[\text{molec.cm}^{-2}]$ , (b) production rates and (c) loss rates for BrO both in  $[\text{molec.cm}^{-2}.\text{s}^{-1}]$  from 24 December at 14:00 to 31 December 2018 at 00:00 UTC in the young plume.

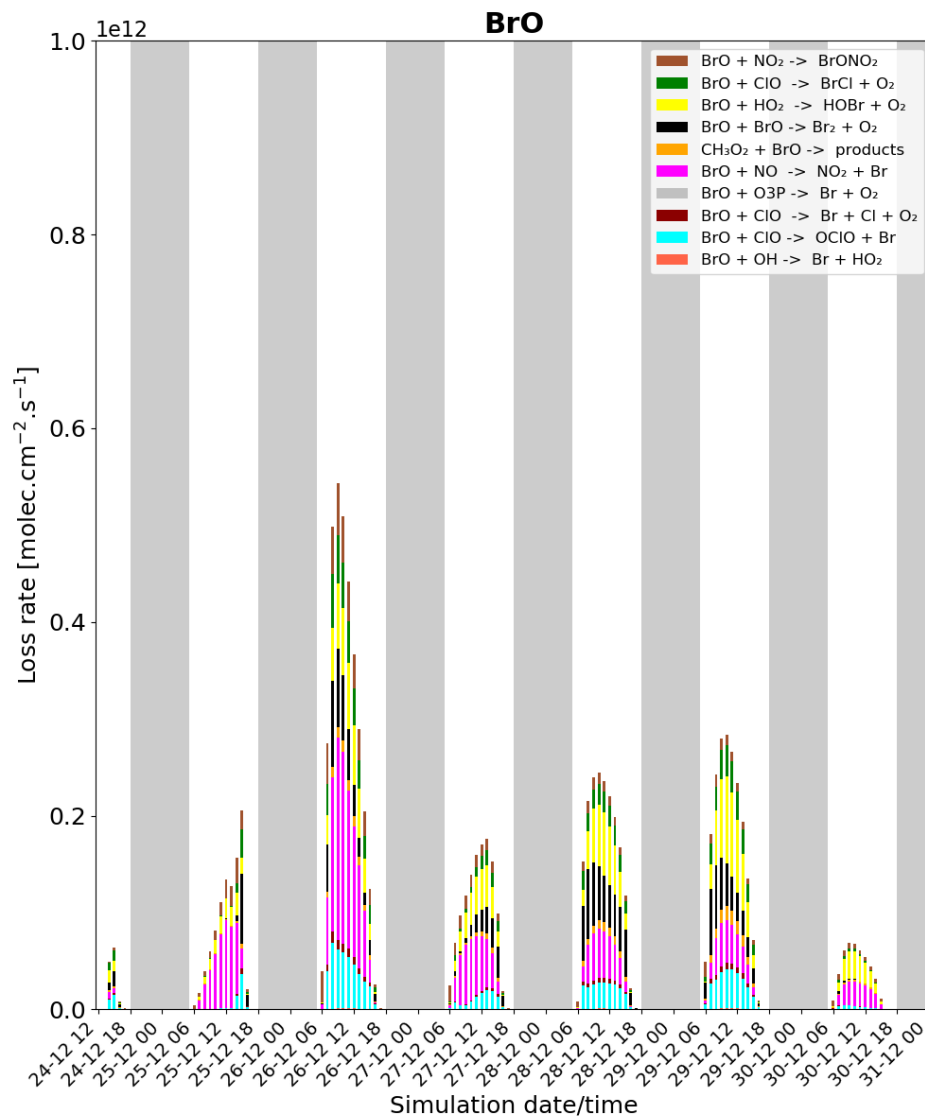

**Figure S4.** Time evolution of BrO loss rates in [molec.cm<sup>-2</sup>.s<sup>-1</sup>] without the photolysis of BrO and the BrO + BrO → Br + Br + O<sub>2</sub> reaction from 24 December at 14:00 to 31 December 2018 at 00:00 UTC in the young plume.

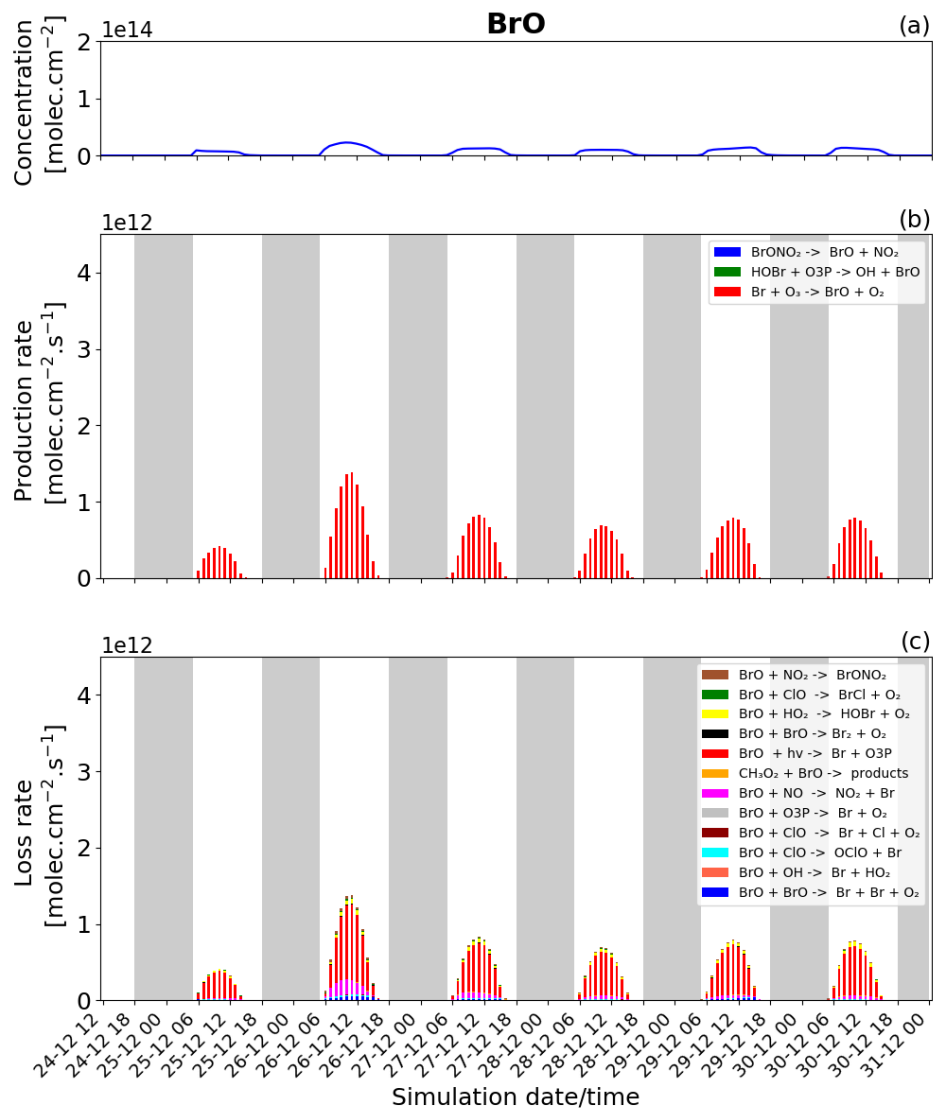

**Figure S5.** Time evolution of : (a) BrO column concentration in  $[\text{molec.cm}^{-2}]$ , (b) production rates and (c) loss rates for BrO both in  $[\text{molec.cm}^{-2}.\text{s}^{-1}]$  from 24 December at 20:00 to 31 December 2018 at 00:00 UTC in the aged plume.

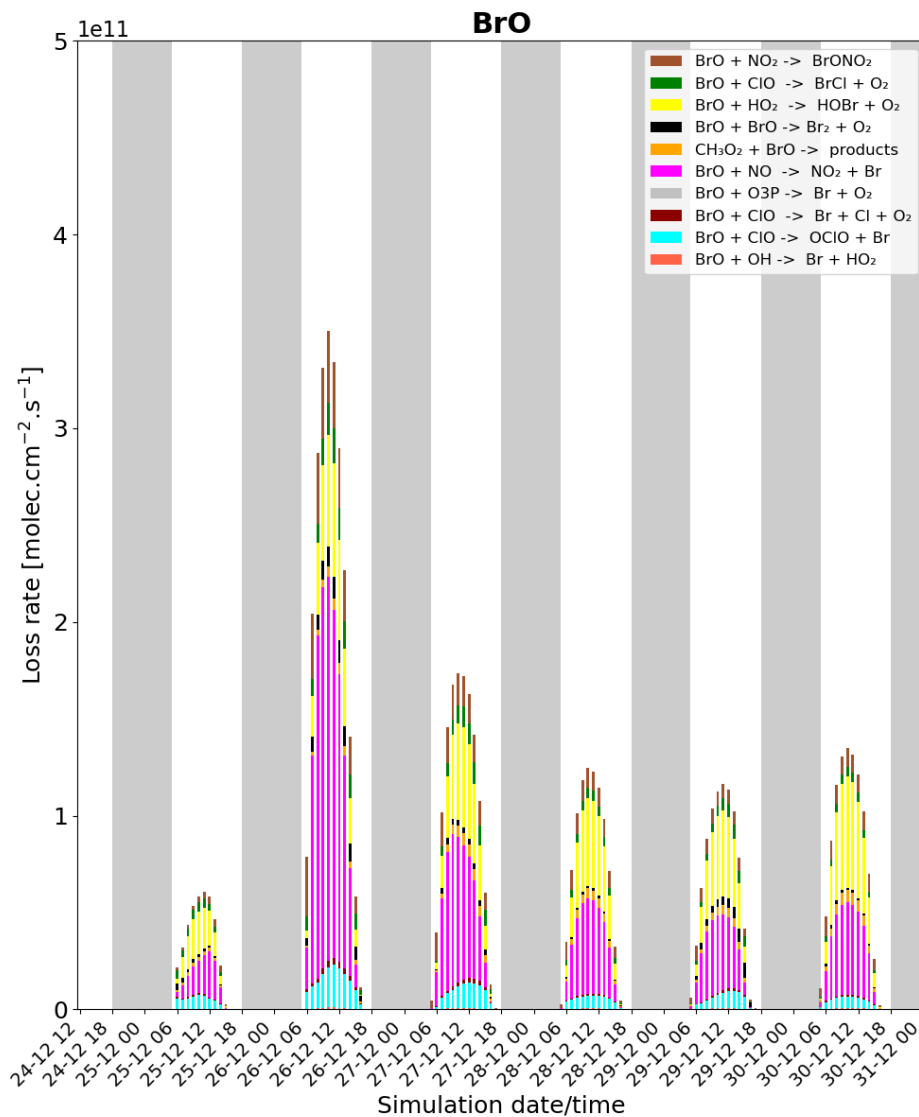

**Figure S6.** Time evolution of BrO loss rates in  $[\text{molec.cm}^{-2}.\text{s}^{-1}]$  without the photolysis of BrO and the  $\text{BrO} + \text{BrO} \rightarrow \text{Br} + \text{Br} + \text{O}_2$  reaction, from 24 December at 20:00 to 31 December 2018 at 00:00 UTC in the aged plume.

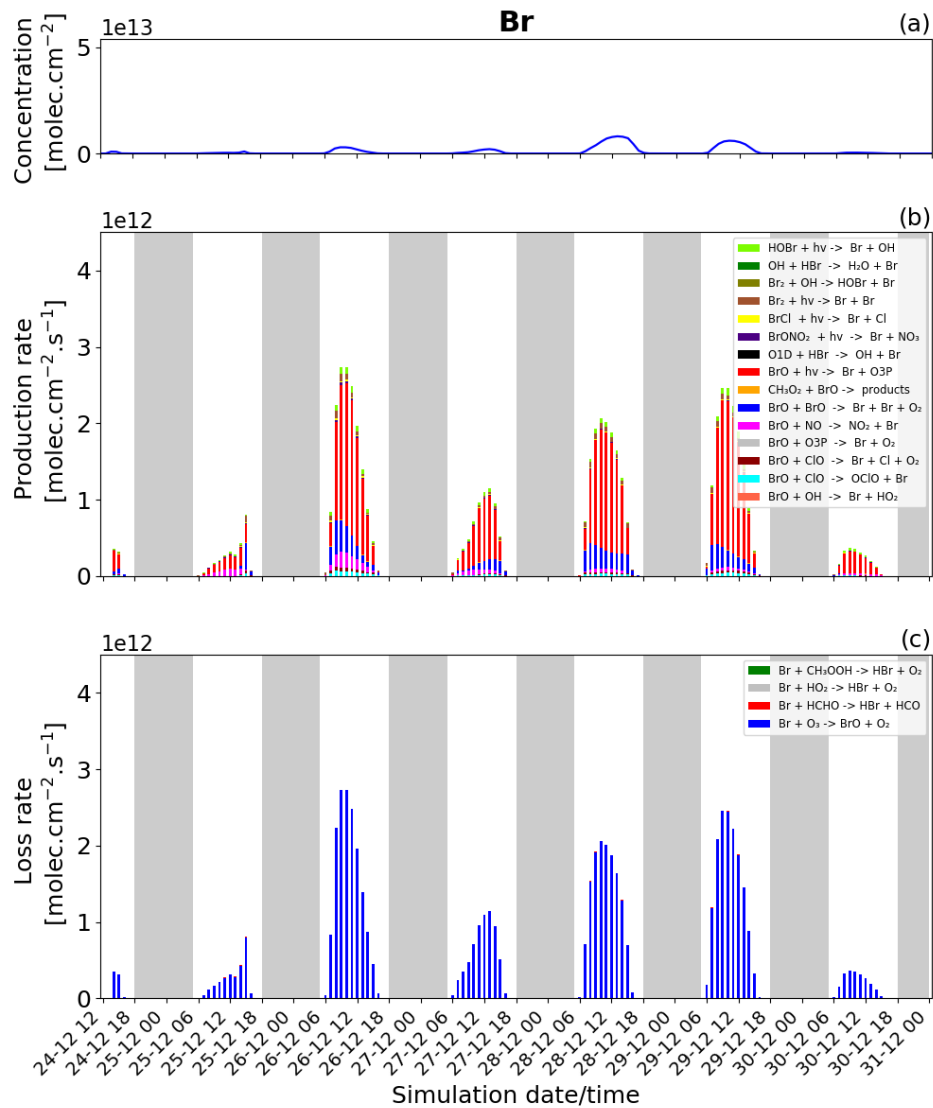

**Figure S7.** Time evolution of : (a) Br column concentration in  $[\text{molec.cm}^{-2}]$ , (b) production rates and (c) loss rates for Br both in  $[\text{molec.cm}^{-2}.\text{s}^{-1}]$  from 24 December at 14:00 to 31 December 2018 at 00:00 UTC in the young plume.



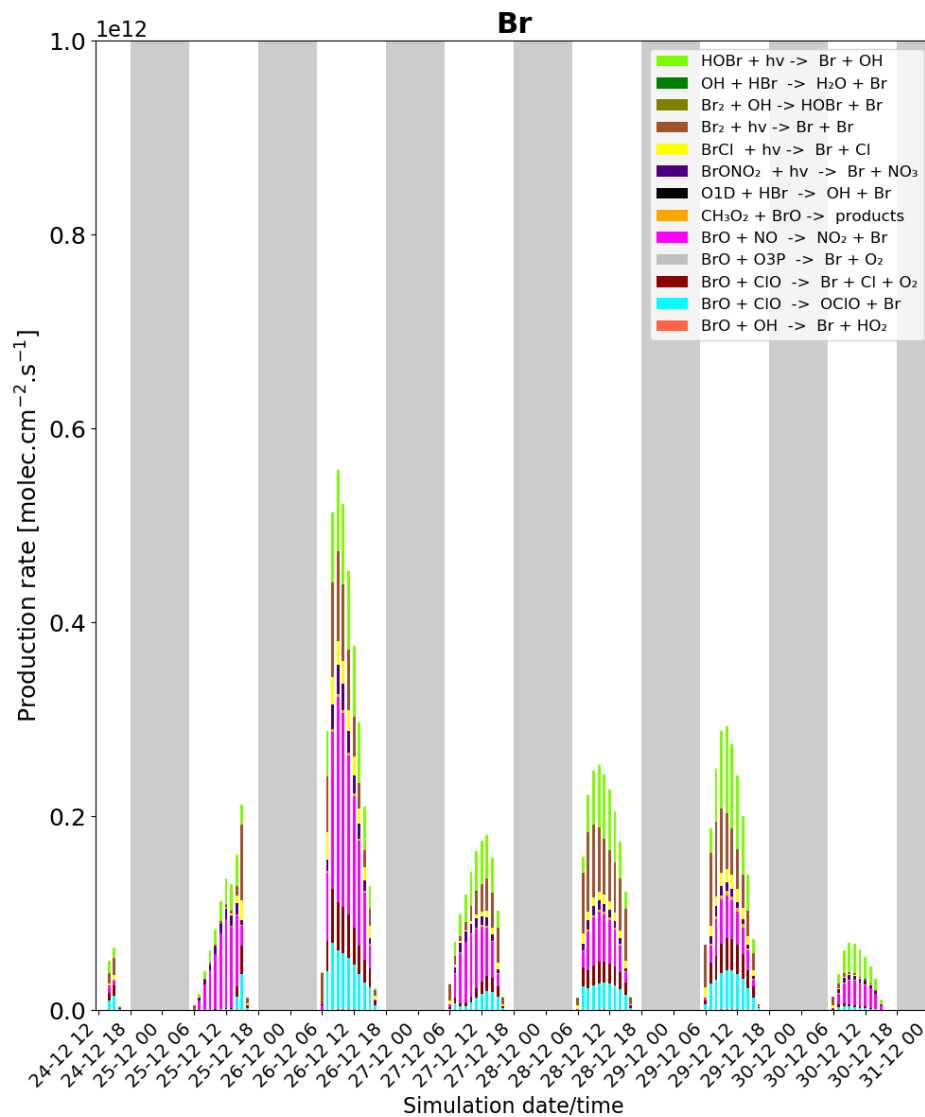

**Figure S8.** Time evolution of Br production rates in  $[\text{molec.cm}^{-2}.\text{s}^{-1}]$  without the photolysis of BrO and the  $\text{BrO} + \text{BrO} \rightarrow \text{Br} + \text{Br} + \text{O}_2$  reaction, from 24 December at 14:00 to 31 December 2018 at 00:00 UTC in the young plume.

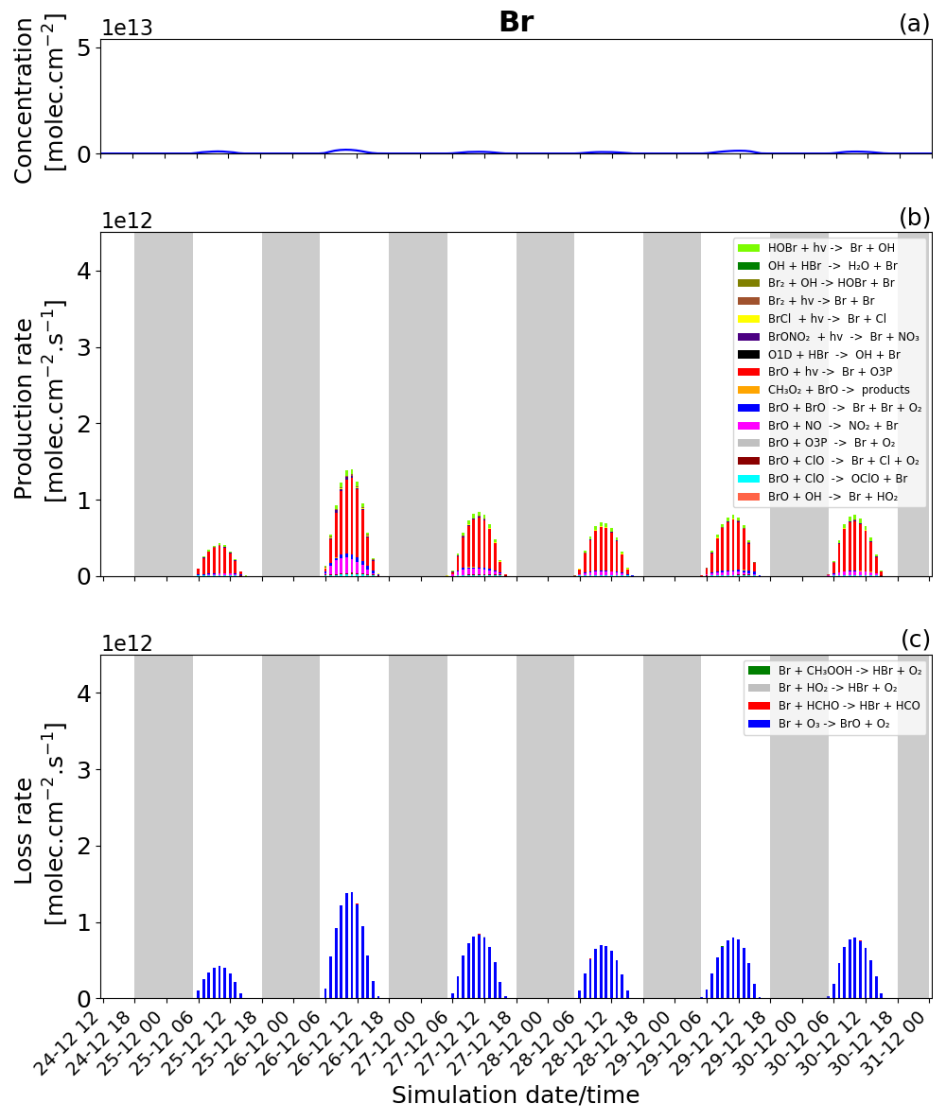

**Figure S9.** Time evolution of : (a) Br column concentration in  $[\text{molec.cm}^{-2}]$ , (b) production rates and (c) loss rates for Br both in  $[\text{molec.cm}^{-2}.\text{s}^{-1}]$  from 24 December at 20:00 to 31 December 2018 at 00:00 UTC in the aged plume.

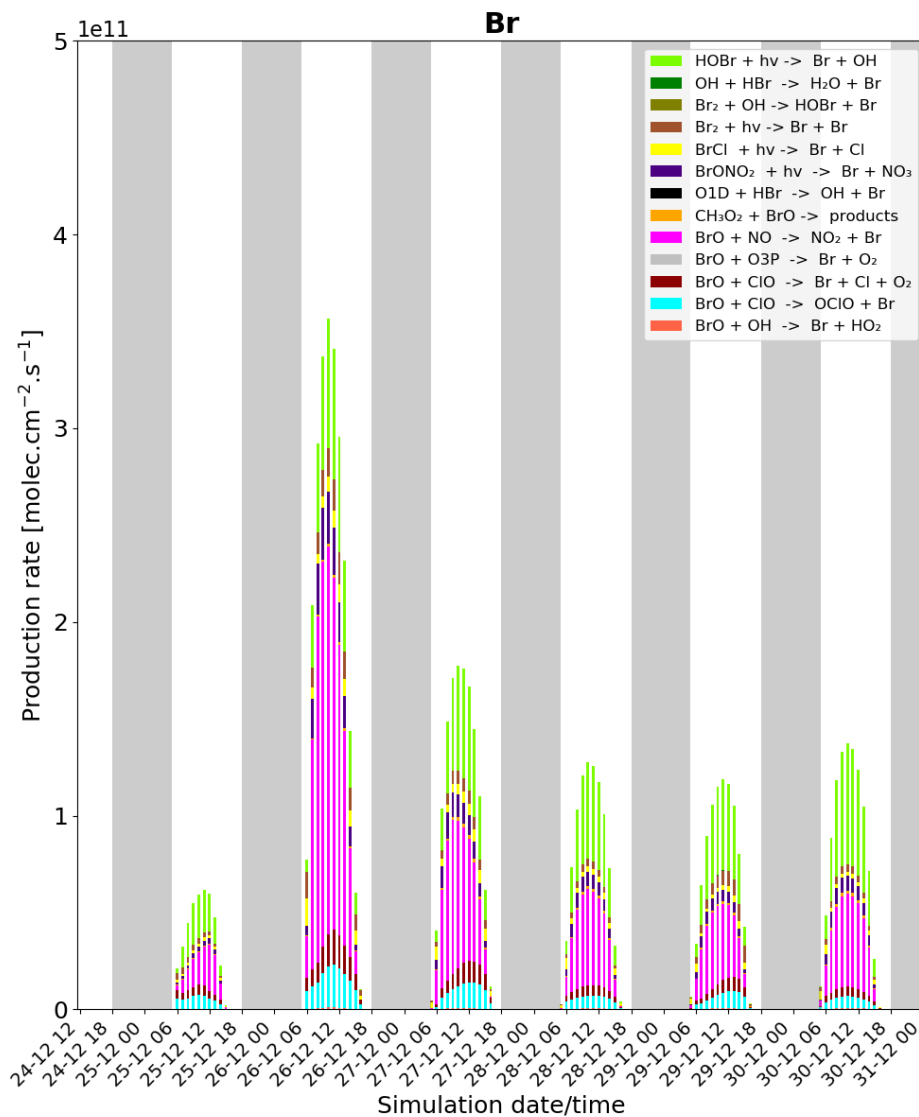

**Figure S10.** Time evolution of Br production rates in [ $\text{molec.cm}^{-2}.\text{s}^{-1}$ ], without the photolysis of BrO and the  $\text{BrO} + \text{BrO} \rightarrow \text{Br} + \text{Br} + \text{O}_2$  reaction from 24 December at 20:00 to 31 December 2018 at 00:00 UTC in the aged plume.

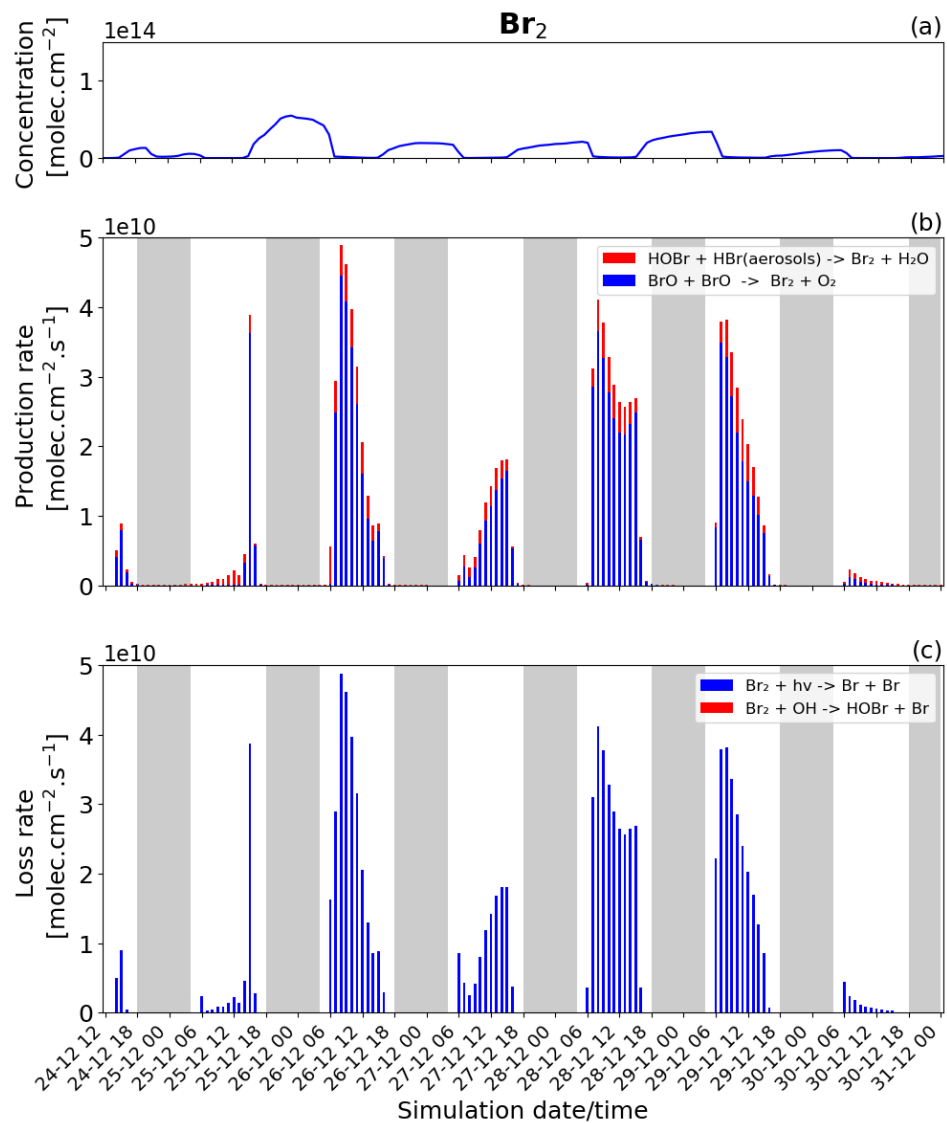

**Figure S11.** Time evolution of : (a)  $\text{Br}_2$  column concentration in  $[\text{molec.cm}^{-2}]$ , (b) production rates and (c) loss rates for  $\text{Br}_2$  both in  $[\text{molec.cm}^{-2}.\text{s}^{-1}]$  from 24 December at 14:00 to 31 December 2018 at 00:00 UTC in the young plume.

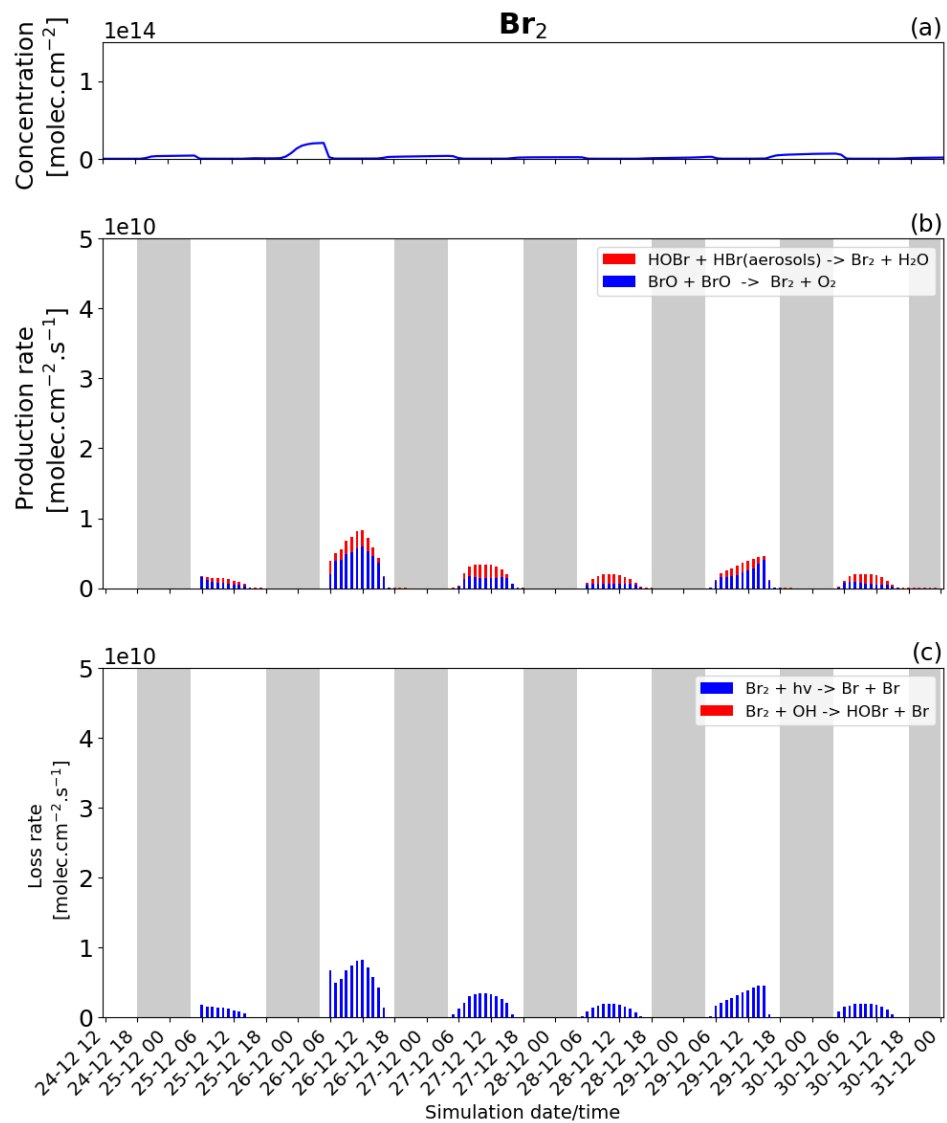

**Figure S12.** Time evolution of : (a)  $\text{Br}_2$  column concentration in  $[\text{molec.cm}^{-2}]$ , (b) production rates and (c) loss rates for  $\text{Br}_2$  both in  $[\text{molec.cm}^{-2}.\text{s}^{-1}]$  from 24 December at 20:00 to 31 December 2018 at 00:00 UTC in the aged plume.

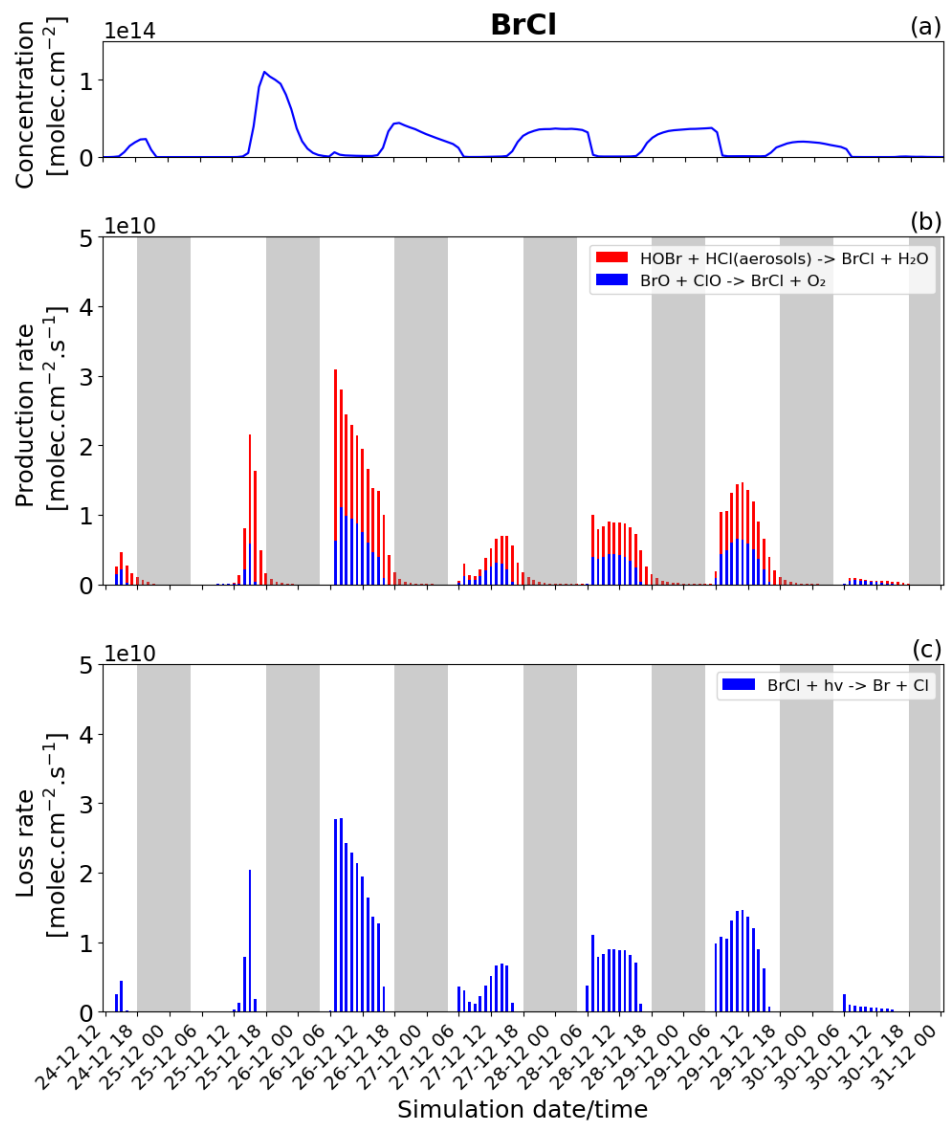

**Figure S13.** Time evolution of : (a) BrCl column concentration in  $\text{[molec.cm}^{-2}\text{]}$ , (b) production rates and (c) loss rates for BrCl both in  $\text{[molec.cm}^{-2}\text{.s}^{-1}\text{]}$  from 24 December at 14:00 to 31 December 2018 at 00:00 UTC in the young plume.

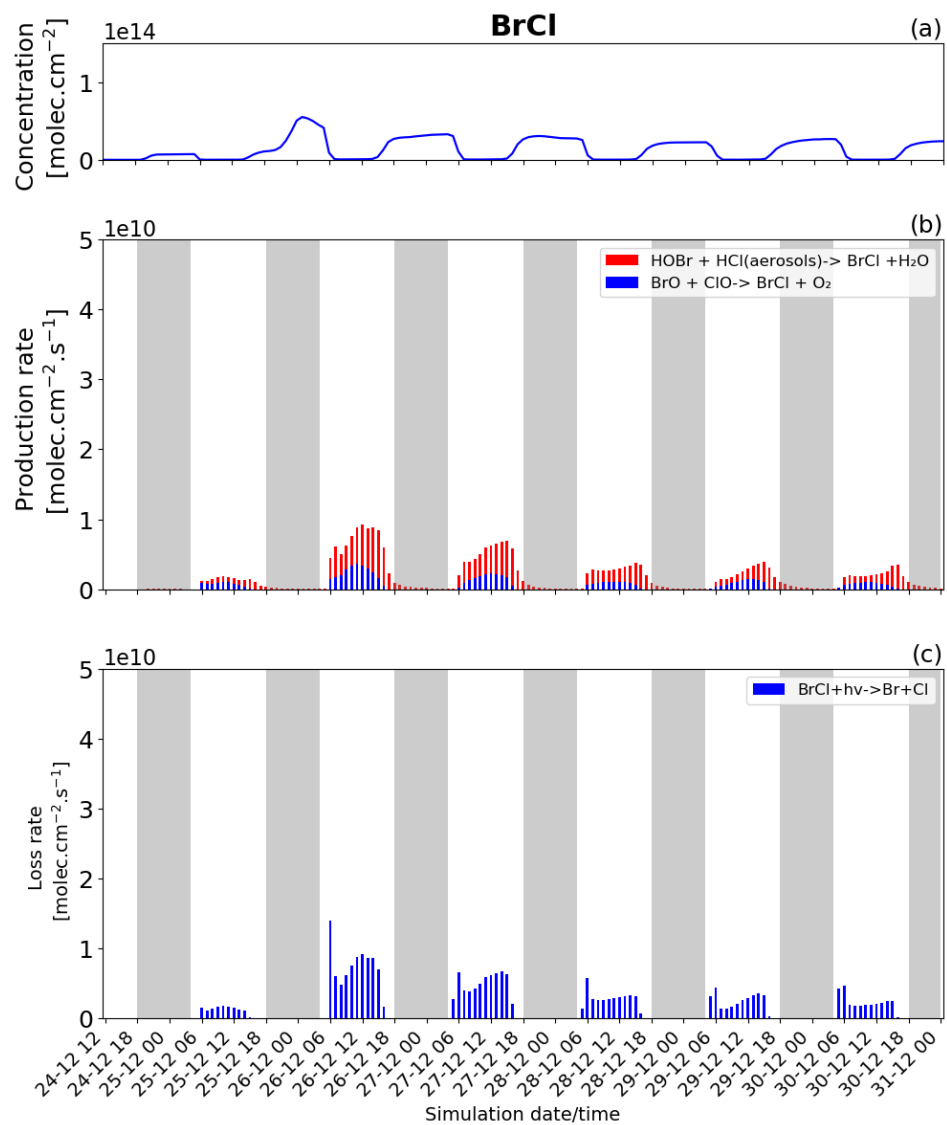

**Figure S14.** Time evolution of : (a) BrCl column concentration in  $[\text{molec.cm}^{-2}]$ , (b) production rates and (c) loss rates for BrCl both in  $[\text{molec.cm}^{-2}.\text{s}^{-1}]$  from 24 December at 20:00 to 31 December 2018 at 00:00 UTC in the aged plume.

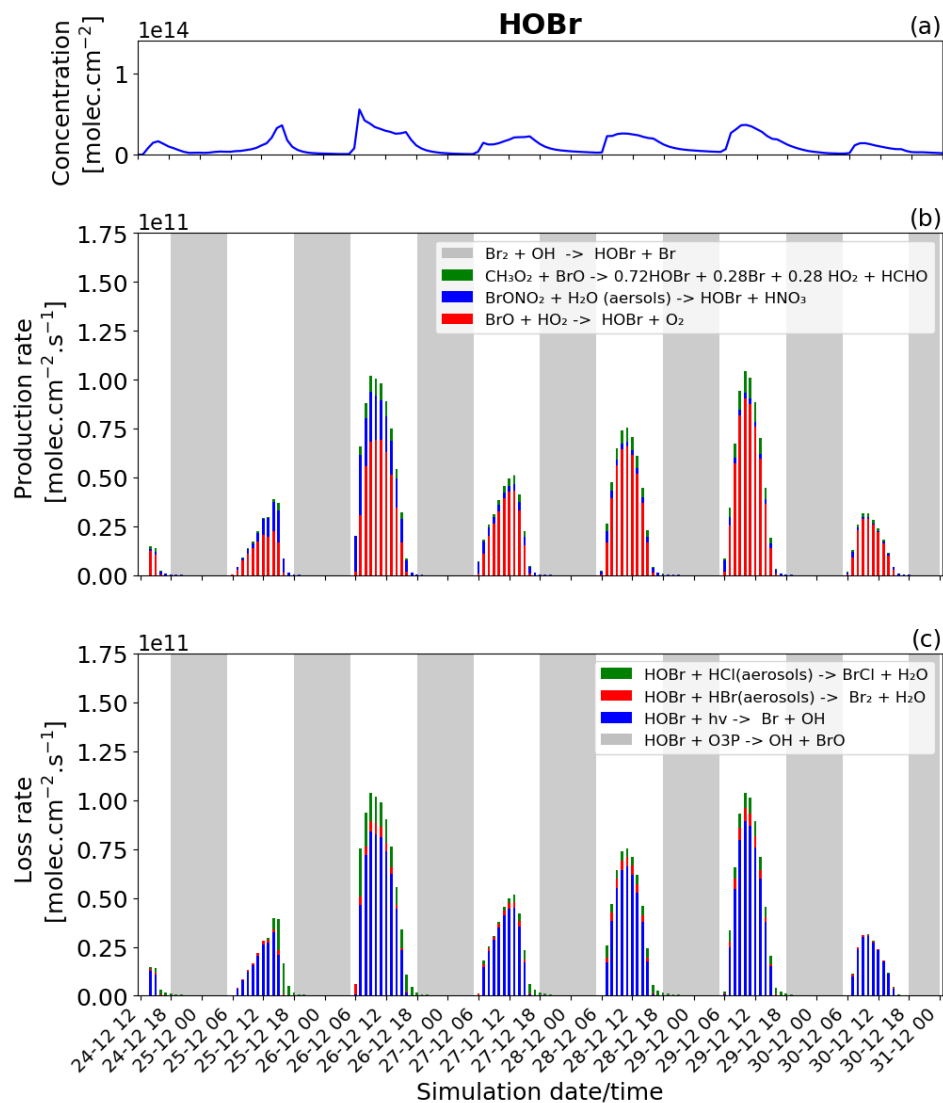

**Figure S15.** Time evolution of : (a) HOBr column concentration in  $[\text{molec.cm}^{-2}]$ , (b) production rates and (c) loss rates for HOBr both in  $[\text{molec.cm}^{-2}.\text{s}^{-1}]$  from 24 December at 14:00 to 31 December 2018 at 00:00 UTC in the young plume.



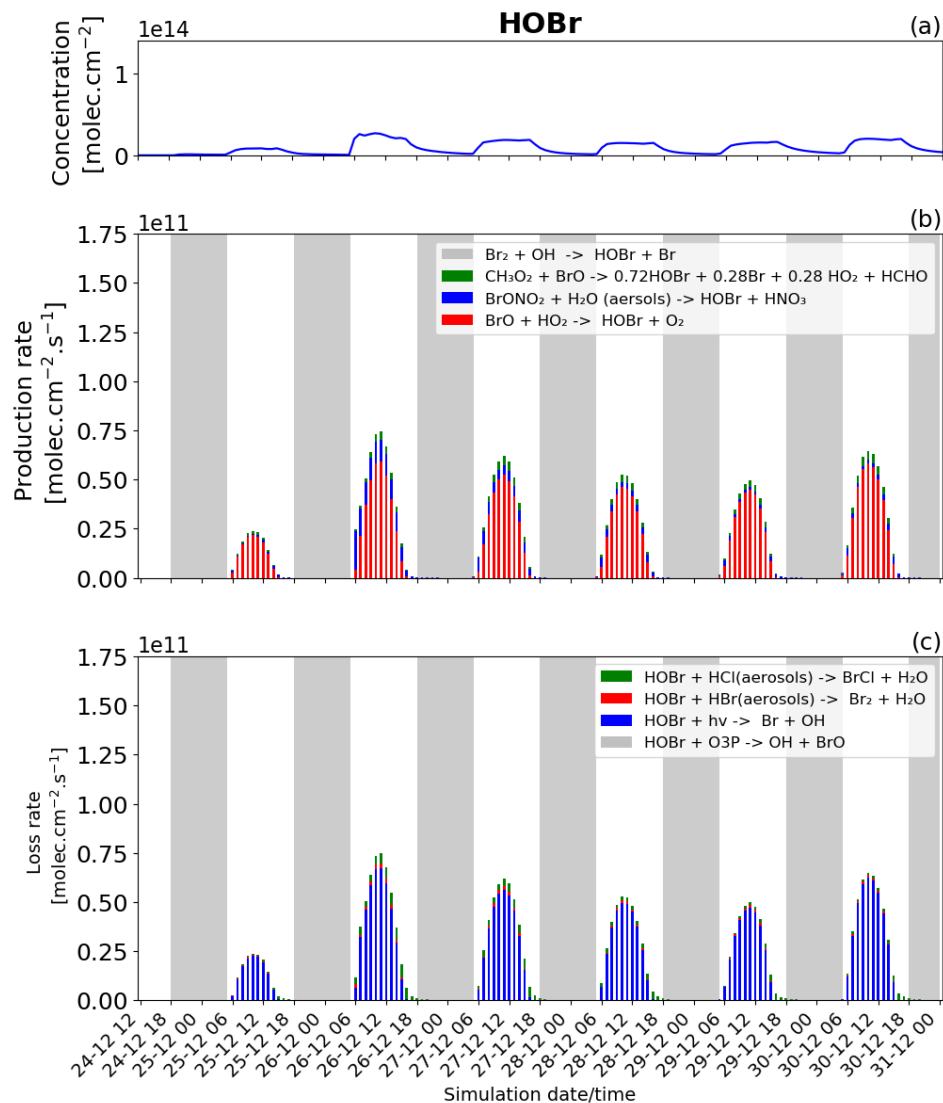

**Figure S16.** Time evolution of : (a) HOBr column concentration in [molec.cm<sup>-2</sup>], (b) production rates and (c) loss rates for HOBr both in [molec.cm<sup>-2</sup>.s<sup>-1</sup>] from 24 December at 20:00 to 31 December 2018 at 00:00 UTC in the aged plume.

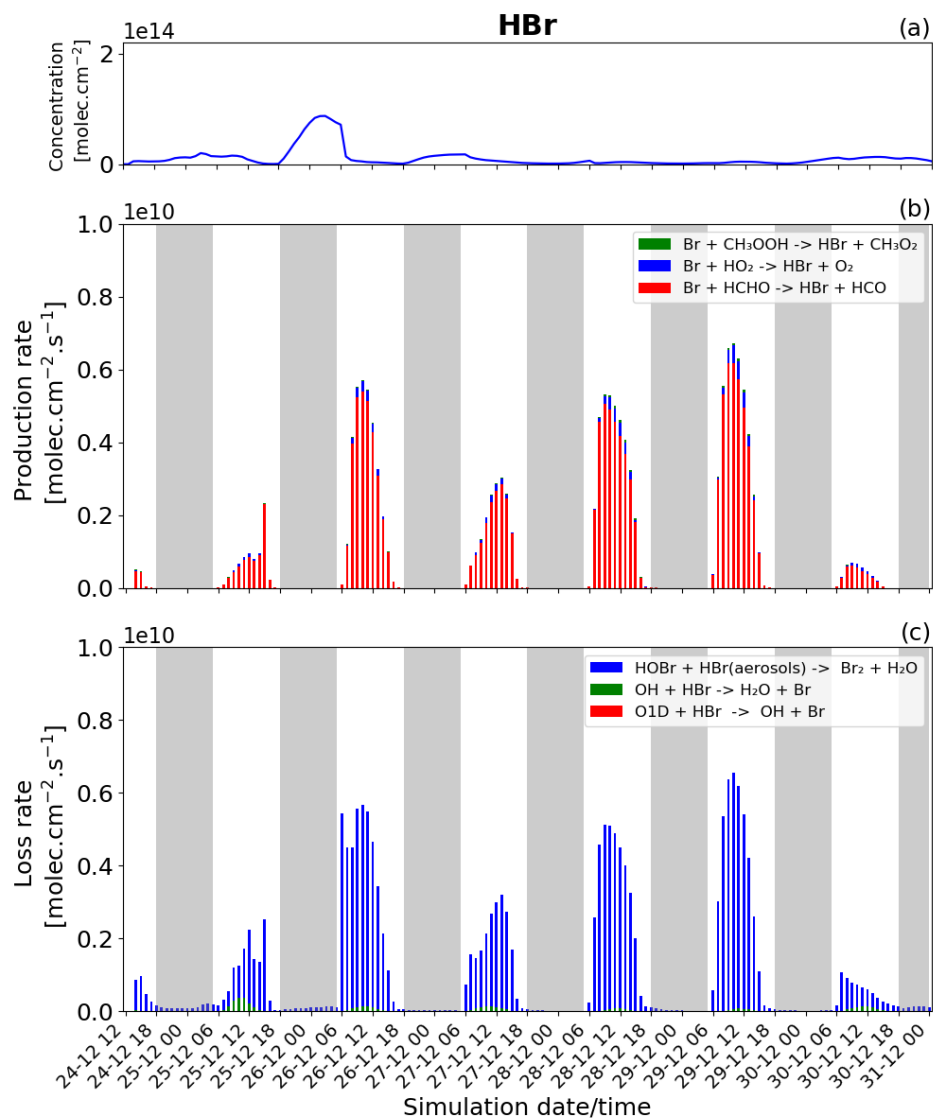

**Figure S17.** Time evolution of : (a) HBr column concentration in  $\text{[molec.cm}^{-2}\text{]}$ , (b) production rates and (c) loss rates for HBr both in  $\text{[molec.cm}^{-2}\text{.s}^{-1}\text{]}$  from 24 December at 14:00 to 31 December 2018 at 00:00 UTC in the young plume.

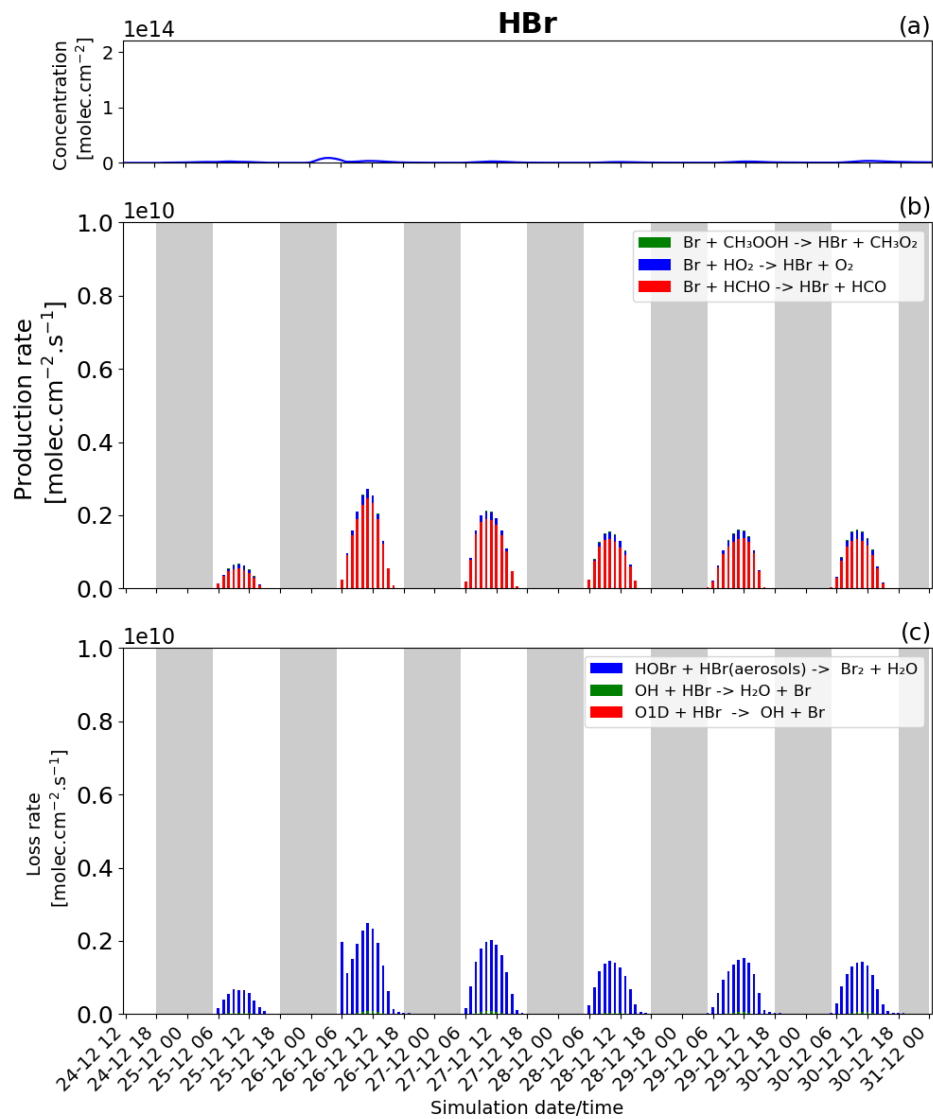

**Figure S18.** Time evolution of : (a) HBr column concentration in [molec.cm<sup>-2</sup>], (b) production rates and (c) loss rates for HBr both in [molec.cm<sup>-2</sup>.s<sup>-1</sup>] from 24 December at 20:00 to 31 December 2018 at 00:00 UTC in the aged plume.

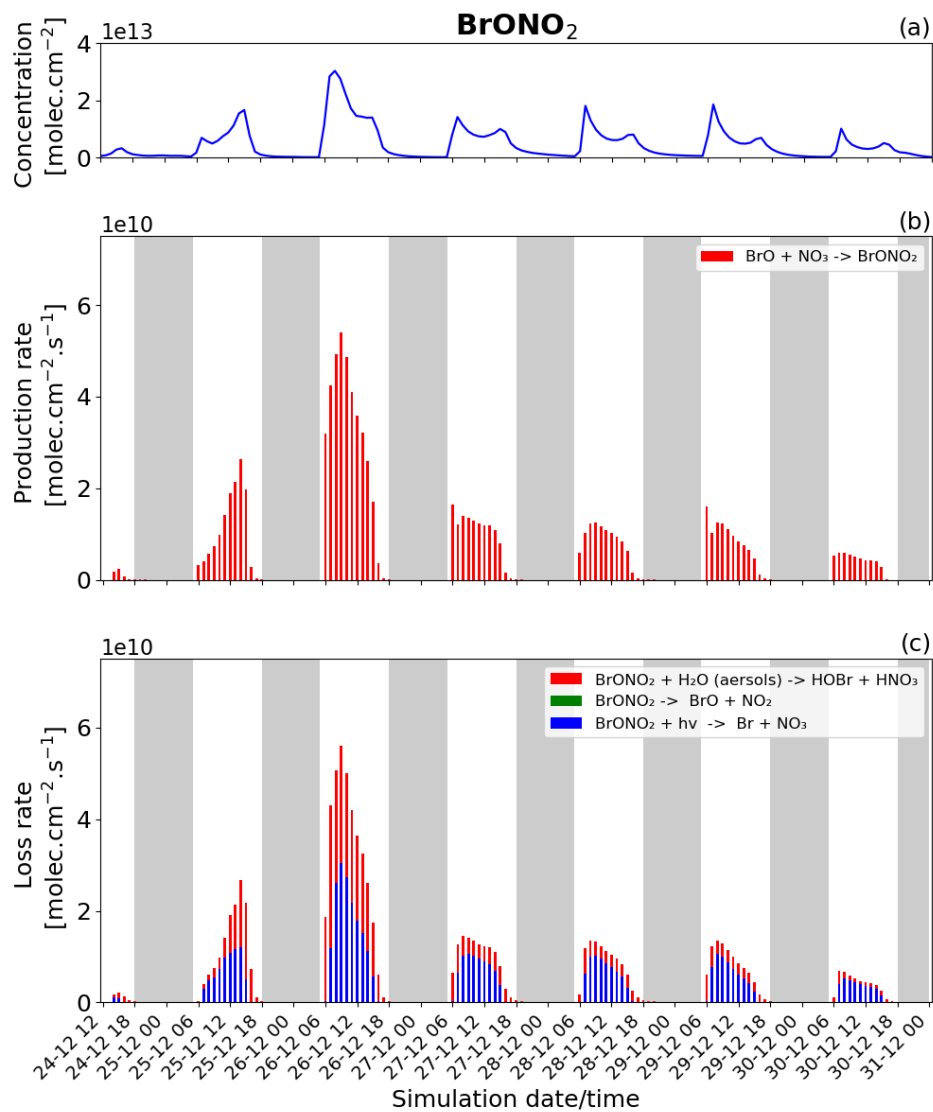

**Figure S19.** Time evolution of : (a) BrONO<sub>2</sub> column concentration in [molec.cm<sup>-2</sup>], (b) production rates and (c) loss rates for BrONO<sub>2</sub> both in [molec.cm<sup>-2</sup>.s<sup>-1</sup>] from 24 December at 14:00 to 31 December 2018 at 00:00 UTC in the young plume.

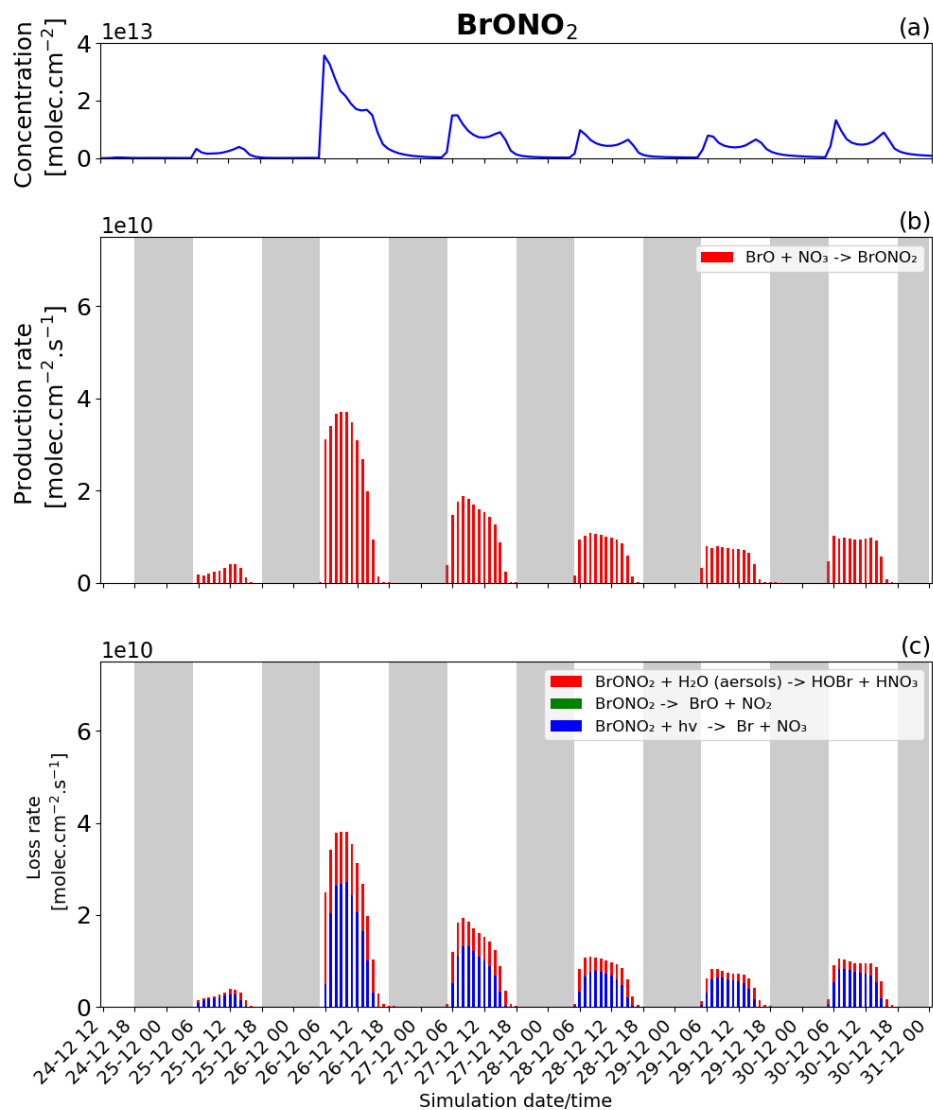

**Figure S20.** Time evolution of : (a) BrONO<sub>2</sub> column concentration in [molec.cm<sup>-2</sup>], (b) production rates and (c) loss rates for BrONO<sub>2</sub> both in [molec.cm<sup>-2</sup>.s<sup>-1</sup>] from 24 December at 20:00 to 31 December 2018 at 00:00 UTC in the aged plume.

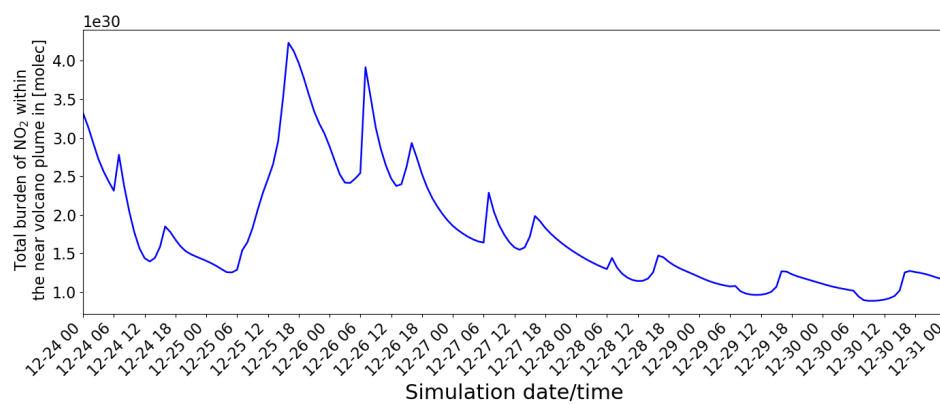

**Figure S21.** Time evolution of the total burden of the NO<sub>2</sub> within plume in [molec] from 24 December at 12:00 to 31 December 2018 at 00:00 UTC in the near volcano domain.
